# Supplementary material for: Variation in Phytochemical, Antioxidant and Volatile Composition of Pomelo Fruit (Citrus grandis (L.) Osbeck) during Seasonal Growth and Development
Source: MDPI journal article supplement (doi:10.3390/plants10091941), 2021-09-17
Supplement: s1 [file s1]

**Table S1. Correlation of DAFS with bioactive compounds and antioxidant activities in seed**

| 2018                 | DPPH    | Antioxidant capacity | FRAP     | Naringin | TFC     | TPC     |
|----------------------|---------|----------------------|----------|----------|---------|---------|
| Antioxidant capacity | 0.917*  |                      |          |          |         |         |
| FRAP                 | 0.916*  | 0.972**              |          |          |         |         |
| Naringin             | 0.888*  | 0.974**              | 0.994**  |          |         |         |
| TFC                  | 0.872   | 0.934*               | 0.978**  | 0.988**  |         |         |
| TPC                  | 0.943*  | 0.938*               | 0.987**  | 0.969**  | 0.965** |         |
| DAFS                 | -0.950* | -0.993**             | -0.960** | -0.953*  | -0.910* | -0.938* |

Note: significance level: \* p<0.05; \*\* p<0.01

| 2019                 | DPPH   | Antioxidant capacity | FRAP   | Naringin | TFC     | TPC    |
|----------------------|--------|----------------------|--------|----------|---------|--------|
| Antioxidant capacity | 0.779  |                      |        |          |         |        |
| FRAP                 | .913*  | 0.957*               |        |          |         |        |
| Naringin             | 0.786  | 0.987**              | 0.933* |          |         |        |
| TFC                  | 0.500  | 0.864                | 0.738  | 0.870    |         |        |
| TPC                  | 0.549  | 0.918*               | 0.795  | 0.918*   | 0.991** |        |
| DAFS                 | -0.799 | -.973**              | -.936* | -.976**  | -0.757  | -0.832 |

**Table S2. Correlation of DAFS with bioactive compounds and antioxidant activities in membrane**

| 2018                 | DPPH   | Antioxidant capacity | FRAP     | Naringin | TFC      | TPC      |
|----------------------|--------|----------------------|----------|----------|----------|----------|
| Antioxidant capacity | 0.813  |                      |          |          |          |          |
| FRAP                 | 0.750  | 0.954*               |          |          |          |          |
| Naringin             | 0.678  | 0.961**              | 0.981**  |          |          |          |
| TFC                  | 0.933* | 0.947*               | 0.931*   | 0.894*   |          |          |
| TPC                  | 0.871  | 0.984**              | 0.947*   | 0.944*   | 0.982**  |          |
| DAFS                 | -0.807 | -0.975**             | -0.968** | -0.974** | -0.962** | -0.990** |

| 2019                 | DPPH    | Antioxidant capacity | FRAP    | Naringin | TFC      | TPC    |
|----------------------|---------|----------------------|---------|----------|----------|--------|
| Antioxidant capacity | 0.708   |                      |         |          |          |        |
| FRAP                 | 0.755   | 0.950*               |         |          |          |        |
| Naringin             | 0.925*  | 0.627                | 0.783   |          |          |        |
| TFC                  | 0.927*  | 0.874                | 0.937*  | 0.923*   |          |        |
| TPC                  | 0.783   | 0.459                | 0.467   | 0.709    | 0.708    |        |
| DAFS                 | -0.948* | -0.852               | -0.919* | -0.938*  | -0.998** | -0.710 |

**Table S3. Correlation of DAFS with bioactive compounds and antioxidant activities in albedo**

| 2018                 | DPPH    | Antioxidant capacity | FRAP    | Naringin | TFC    | TPC    |
|----------------------|---------|----------------------|---------|----------|--------|--------|
| Antioxidant capacity | 0.827   |                      |         |          |        |        |
| FRAP                 | 0.358   | 0.755                |         |          |        |        |
| Naringin             | 0.089   | 0.552                | 0.943*  |          |        |        |
| TFC                  | 0.993** | 0.884*               | 0.427   | 0.160    |        |        |
| TPC                  | 0.965** | 0.723                | 0.280   | -0.022   | 0.942* |        |
| DAFS                 | -0.681  | -0.910*              | -0.926* | -0.778   | -0.728 | -0.608 |

  

| 2019                 | DPPH   | Antioxidant capacity | FRAP     | Naringin | TFC     | TPC     |
|----------------------|--------|----------------------|----------|----------|---------|---------|
| Antioxidant capacity | 0.654  |                      |          |          |         |         |
| FRAP                 | -0.167 | 0.595                |          |          |         |         |
| Naringin             | 0.095  | 0.814                | 0.926*   |          |         |         |
| TFC                  | -0.174 | 0.569                | 0.991**  | 0.901*   |         |         |
| TPC                  | 0.420  | 0.909*               | 0.824    | 0.891*   | 0.812   |         |
| DAFS                 | -0.100 | -0.773               | -0.964** | -0.956*  | -0.949* | -0.944* |

**Table S4. Correlation of DAFS with bioactive compounds and antioxidant activities in flavedo**

| 2018                 | DPPH   | Antioxidant capacity | FRAP   | Naringin | TFC    | TPC     |
|----------------------|--------|----------------------|--------|----------|--------|---------|
| Antioxidant capacity | 0.733  |                      |        |          |        |         |
| FRAP                 | 0.822  | .982**               |        |          |        |         |
| Naringin             | 0.645  | .968**               | .909*  |          |        |         |
| TFC                  | 0.863  | 0.794                | 0.813  | 0.779    |        |         |
| TPC                  | 0.759  | .984**               | .957*  | .984**   | 0.813  |         |
| DAFS                 | -0.793 | -.932*               | -.905* | -.952*   | -.930* | -.960** |

  

| 2019                 | DPPH   | Antioxidant capacity | FRAP   | Naringin | TFC     | TPC     |
|----------------------|--------|----------------------|--------|----------|---------|---------|
| Antioxidant capacity | -0.702 |                      |        |          |         |         |
| FRAP                 | -0.287 | 0.646                |        |          |         |         |
| Naringin             | -0.670 | .961**               | 0.816  |          |         |         |
| TFC                  | -0.705 | .990**               | 0.704  | .968**   |         |         |
| TPC                  | -0.622 | .949*                | 0.848  | .989**   | .973**  |         |
| DAFS                 | 0.588  | -.976**              | -0.771 | -.984**  | -.971** | -.977** |

**Table S5. Correlation of DAFS with bioactive compounds and antioxidant activities in pulp**

| 2018                 | DPPH   | Antioxidant capacity | FRAP    | Naringin | TFC      | TPC      |
|----------------------|--------|----------------------|---------|----------|----------|----------|
| Antioxidant capacity | 0.877  |                      |         |          |          |          |
| FRAP                 | 0.810  | 0.985**              |         |          |          |          |
| Naringin             | 0.437  | 0.812                | 0.850   |          |          |          |
| TFC                  | 0.702  | 0.905*               | 0.862   | 0.883*   |          |          |
| TPC                  | 0.737  | 0.920*               | 0.876   | 0.870    | 0.992**  |          |
| DAFS                 | -0.828 | -0.957*              | -0.912* | -0.823   | -0.970** | -0.988** |

  

| 2019                 | DPPH     | Antioxidant capacity | FRAP    | Naringin | TFC     | TPC    |
|----------------------|----------|----------------------|---------|----------|---------|--------|
| Antioxidant capacity | 0.964**  |                      |         |          |         |        |
| FRAP                 | 0.973**  | 0.919*               |         |          |         |        |
| Naringin             | 0.925*   | 0.921*               | 0.934*  |          |         |        |
| TFC                  | 0.179    | 0.334                | 0.029   | -0.049   |         |        |
| TPC                  | 0.194    | 0.303                | 0.067   | -0.092   | 0.972** |        |
| DAFS                 | -0.960** | -0.986**             | -0.888* | -0.859   | -0.429  | -0.411 |

**Table S6. Correlation of DAFS with bioactive compounds and antioxidant activities in juice**

| 2018                 | DPPH    | Antioxidant capacity | FRAP   | Naringin | TFC    | TPC    |
|----------------------|---------|----------------------|--------|----------|--------|--------|
| Antioxidant capacity | 0.982** |                      |        |          |        |        |
| FRAP                 | 0.897*  | 0.948*               |        |          |        |        |
| Naringin             | 0.482   | 0.490                | 0.246  |          |        |        |
| TFC                  | 0.905*  | 0.930*               | 0.791  | 0.759    |        |        |
| TPC                  | 0.916*  | 0.938*               | 0.865  | 0.446    | 0.906* |        |
| DAFS                 | -0.445  | -0.360               | -0.067 | -0.872   | -0.582 | -0.281 |

  

| 2019                 | DPPH   | Antioxidant capacity | FRAP   | Naringin | TFC     | TPC    |
|----------------------|--------|----------------------|--------|----------|---------|--------|
| Antioxidant capacity | 0.833  |                      |        |          |         |        |
| FRAP                 | 0.050  | 0.077                |        |          |         |        |
| Naringin             | -0.309 | -0.553               | -0.386 |          |         |        |
| TFC                  | 0.633  | 0.220                | 0.092  | 0.446    |         |        |
| TPC                  | 0.560  | 0.145                | 0.006  | 0.552    | 0.992** |        |
| DAFS                 | 0.257  | 0.415                | 0.696  | -0.925*  | -0.295  | -0.412 |
